# Supplementary material for: Understanding structural adaptability: a reactant informatics approach to experiment design
Source: Royal Society of Chemistry journal article supplement (doi:10.1039/c7me00127d), 2018-01-01
Supplement: c7me00127d5.csv [file c7me00127d5.csv]

amine_abbreviation	carbon_nitrogen_ratio	pKa1	pKa2	pKa3	pKa4	min_pKa	mw	length	nitrogenCount	has_primary	has_secondary	is_cyclic	is_spherical	bond_count	solid_at_rtp	maxproj_N	actual_V_amount	actual_Se_amount	actual_amine_amount	actual_water_amount	actual_pH	Na_present	NH4_present	temp	outcome	purity
S-2mpip	2.5	9.65	5.3	?	?	5.3	100.16	6	2	0	1	1	0	19	1	18.035	0.001003681	0.011934583	0.001201078	5.7953	1	0	0	110	1	2
pip	2	9.56	5.18	?	?	5.18	86.14	5	2	0	1	1	0	16	1	16.865	0.000996933	0.011914759	0.001072672	5.5965	1	0	0	110	0	0
1,4-dmpip	3	8.87	3.11	?	?	3.11	114.19	6	2	0	0	1	0	22	0	22.82	0.000995706	0.01255091	0.001039496	6.0418	0.5	0	0	110	0	0
R-2mpip	2.5	9.65	5.3	?	?	5.3	100.16	6	2	0	1	1	0	19	1	18.035	0.001003681	0.011896738	0.001072284	6.6555	1	0	0	110	1	2
2,5-dmpip	3	9.75	5.41	?	?	5.41	114.19	6	2	0	1	1	0	22	1	22.155	0.000995706	0.011917463	0.001068395	6.0448	0.5	0	0	110	1	2
deta	1.33	9.93	8.84	5.34	?	5.37	103.17	6	3	1	1	0	0	19	0	14.23	0.001008589	0.01188142	0.001093341	5.8475	1.5	0	0	110	1	1
tmed	3	9.41	5.34	?	?	5.34	116.2	5	2	0	0	0	0	19	0	22.88	0.001038037	0.012026491	0.001194492	6.0738	1	0	0	110	0	0
2-mpip	2.5	9.65	5.3	?	?	5.3	100.16	6	2	0	1	1	0	19	1	18.035	0.001020245	0.012401334	0.001047324	5.933	1	0	0	110	1	2
teta	1.5	9.77	9.16	6.8	4.05	4.05	146.23	9	4	1	1	0	0	27	0	14.898	0.001055215	0.011921067	0.000985434	6.9412	1	0	0	110	0	0
hpip	2.5	7.36	0.32	?	?	0.32	100.16	6	2	0	1	1	0	19	1	19.465	0.001032515	0.016345287	0.00142472	6.1366	1	0	0	110	0	0
3-apyr	2	10.84	7.34	?	?	7.34	86.14	5	2	1	1	1	0	16	1	16.325	0.000991411	0.012198594	0.001022884	6.6577	0.5	0	0	110	0	0
Aqn	3.5	10.35	7.28	?	?	7.28	126.2	6	2	1	0	1	1	24	1	19.645	0.001006155	0.010034892	0.001244476	6.0441	1.5	0	1	110	0	0
deta	1.33	9.93	8.84	5.34	?	5.37	103.17	6	3	1	1	0	0	19	0	14.23	0.000979655	0.010256649	0.001237763	6.0065	1.5	0	1	110	1	1
tmed	3	9.41	5.34	?	?	5.34	116.2	5	2	0	0	0	0	19	0	22.88	0.001012139	0.008007289	0.001006024	6.0421	1.5	0	1	110	0	0
2-mpip	2.5	9.65	5.3	?	?	5.3	100.16	6	2	0	1	1	0	19	1	18.035	0.00097709	0.01007211	0.001300919	6.0636	1.5	0	1	110	0	0
1-mpip	2.5	9.46	5.13	?	?	5.13	100.16	6	2	0	1	1	0	19	0	19.645	0.000990768	0.010110878	0.001151158	6.0587	1.5	0	1	110	0	0
2,6-dmpip	3	9.76	5.43	?	?	5.43	114.19	6	2	0	1	1	0	22	1	22.155	0.00097709	0.010046522	0.000999212	6.0823	1.5	0	1	110	0	0
teta	1.5	9.77	9.16	6.8	4.05	4.05	146.23	9	4	1	1	0	0	27	0	14.898	0.001117285	0.010202373	0.001603638	6.0106	1.5	0	1	110	0	0
en	1	9.69	6.98	?	?	6.98	60.1	3	2	1	0	0	0	11	0	14.025	0.001000171	0.01041405	0.001281198	6.0448	1.5	0	1	110	0	0
dmed	2	9.85	6.9	?	?	6.9	88.15	5	2	0	1	0	0	13	0	19.64	0.001001026	0.010512522	0.0009654	6.0548	1.5	0	1	110	1	2
2,5-dmpip	3	9.75	5.41	?	?	5.41	114.19	6	2	0	1	1	0	22	1	22.155	0.000959993	0.009950376	0.001077152	6.0107	1.5	0	1	110	0	0
deta	1.33	9.93	8.84	5.34	?	5.37	103.17	6	3	1	1	0	0	19	0	14.23	0.000994187	0.010229771	0.00108171	8.9645	1.5	0	1	110	1	1
2,5-dmpip	3	9.75	5.41	?	?	5.41	114.19	6	2	0	1	1	0	22	1	22.155	0.001025153	0.009943233	0.001064892	6.0992	1.5	0	0	90	1	1
1,4-dmpip	3	8.87	3.11	?	?	3.11	114.19	6	2	0	0	1	0	22	0	22.82	0.001003067	0.0099153	0.001046501	6.0294	1.5	0	0	90	0	0
dabco	3	10.16	5.25	?	?	5.25	112.17	3	2	0	0	1	1	21	1	17.035	0.00101411	0.010072986	0.001061781	6.0981	1.5	0	0	90	0	0
2-mpip	2.5	9.65	5.3	?	?	5.3	100.16	6	2	0	1	1	0	19	1	18.035	0.000995092	0.007964498	0.001269968	6.0496	4	0	0	110	1	1
1-mpip	2.5	9.46	5.13	?	?	5.13	100.16	6	2	0	1	1	0	19	0	19.645	0.001027526	0.008006513	0.001132188	6.0318	1.5	0	1	110	0	0
2-mpip	2.5	9.65	5.3	?	?	5.3	100.16	6	2	0	1	1	0	19	1	18.035	0.001001026	0.008066992	0.001180112	6.017	1.5	0	1	110	0	0
2,6-dmpip	3	9.76	5.43	?	?	5.43	114.19	6	2	0	1	1	0	22	1	22.155	0.000983929	0.008236024	0.001134075	6.1629	1.5	0	1	110	0	0
2,5-dmpip	3	9.75	5.41	?	?	5.41	114.19	6	2	0	1	1	0	22	1	22.155	0.001025816	0.00815616	0.001111306	6.0326	1.5	0	1	110	0	0
tmed	3	9.41	5.34	?	?	5.34	116.2	5	2	0	0	0	0	19	0	22.88	0.001040349	0.009928666	0.00101463	6.299	1.5	0	1	110	0	0
teta	1.5	9.77	9.16	6.8	4.05	4.05	146.23	9	4	1	1	0	0	27	0	14.898	0.001008719	0.007986353	0.001015523	6.5663	1.5	0	1	110	0	0
Aqn	3.5	10.35	7.28	?	?	7.28	126.2	6	2	1	0	1	1	24	1	19.645	0.001018123	0.008483368	0.001014966	6.3565	1.5	0	1	110	0	0
en	1	9.69	6.98	?	?	6.98	60.1	3	2	1	0	0	0	11	0	14.025	0.001004445	0.008367062	0.001174709	6.0102	1.5	0	1	110	0	0
deta	1.33	9.93	8.84	5.34	?	5.37	103.17	6	3	1	1	0	0	19	0	14.23	0.001036075	0.008031325	0.001070079	6.1441	1.5	0	1	110	1	2
dmed	2	9.85	6.9	?	?	6.9	88.15	5	2	0	1	0	0	13	0	19.64	0.000965122	0.008293402	0.001032331	6.1178	1.5	0	1	110	1	1
deta	1.33	9.93	8.84	5.34	?	5.37	103.17	6	3	1	1	0	0	19	0	14.23	0.000846299	0.011339881	0.001289134	9.0659	1	0	1	110	1	2
deta	1.33	9.93	8.84	5.34	?	5.37	103.17	6	3	1	1	0	0	19	0	14.23	0.000702684	0.012193188	0.001384123	6.0548	1	0	1	110	1	2
2-mpip	2.5	9.65	5.3	?	?	5.3	100.16	6	2	0	1	1	0	19	1	18.035	0.001001227	0.005992972	0.003016174	6.0162	1	0	0	110	1	1
2-mpip	2.5	9.65	5.3	?	?	5.3	100.16	6	2	0	1	1	0	19	1	18.035	0.001995706	0.005033339	0.003091054	6.0302	3	0	0	110	1	1
2,5-dmpip	3	9.75	5.41	?	?	5.41	114.19	6	2	0	1	1	0	22	1	22.155	0.002355215	0.005291043	0.003664069	2.3021	5.5	0	0	110	1	1
dabco	3	10.16	5.25	?	?	5.25	112.17	3	2	0	0	1	1	21	1	17.035	0.002047239	0.004975671	0.003802264	2.2934	4	0	0	110	0	0
tmed	3	9.41	5.34	?	?	5.34	116.2	5	2	0	0	0	0	19	0	22.88	0.001987117	0.005180213	0.003639415	2.3114	6	0	0	110	0	0
pip	2	9.56	5.18	?	?	5.18	86.14	5	2	0	1	1	0	16	1	16.865	0.002001227	0.00505046	0.0038658	2.2821	6	0	0	110	0	0
1-mpip	2.5	9.46	5.13	?	?	5.13	100.16	6	2	0	1	1	0	19	0	19.645	0.001960736	0.004990989	0.003877796	2.6134	6	0	0	110	0	0
1,4-dmpip	3	8.87	3.11	?	?	3.11	114.19	6	2	0	0	1	0	22	0	22.82	0.001968712	0.005350514	0.00365969	2.2434	4.5	0	0	110	0	0
2-mpip	2.5	9.65	5.3	?	?	5.3	100.16	6	2	0	1	1	0	19	1	18.035	0.001959509	0.00518652	0.003718051	2.2133	6	0	0	110	0	0
Aqn	3.5	10.35	7.28	?	?	7.28	126.2	6	2	1	0	1	1	24	1	19.645	0.000960848	0.009856731	0.005844717	6.0648	3	0	1	110	0	0
2-mpip	2.5	9.65	5.3	?	?	5.3	100.16	6	2	0	1	1	0	19	1	18.035	0.000937767	0.009895477	0.00589357	6.6315	3	0	1	110	0	0
2-amp	3	10.1	7.16	?	?	7.16	114.19	7	2	1	1	1	0	22	0	20.36	0.000980509	0.00988106	0.005930467	6.0525	3	0	1	110	0	0
pip	2	9.56	5.18	?	?	5.18	86.14	5	2	0	1	1	0	16	1	16.865	0.000948025	0.010227969	0.006174832	6.0547	3	0	1	110	0	0
deta	1.33	9.93	8.84	5.34	?	5.37	103.17	6	3	1	1	0	0	19	0	14.23	0.000955719	0.009897279	0.005893186	6.2393	3	0	1	110	0	0
2,5-dmpip	3	9.75	5.41	?	?	5.41	114.19	6	2	0	1	1	0	22	1	22.155	0.000959993	0.009853127	0.005807864	6.0887	3	0	1	110	1	2
en	1	9.69	6.98	?	?	6.98	60.1	3	2	1	0	0	0	11	0	14.025	0.0009523	0.009853127	0.005846922	6.1122	3	0	1	110	0	0
3-apyr	2	10.84	7.34	?	?	7.34	86.14	5	2	1	1	1	0	16	1	16.325	0.000941187	0.009899982	0.00587577	6.225	3	0	1	110	0	0
tmed	3	9.41	5.34	?	?	5.34	116.2	5	2	0	0	0	0	19	0	22.88	0.000990768	0.009908993	0.005863167	6.0758	3	0	1	110	0	0
spermine	2.5	11.1	10.05	8.71	8.14	8.14	202.34	13	4	1	1	0	0	41	1	20.5775	0.00092409	0.009840512	0.005867846	6.1915	3	0	1	110	0	0
dabco	3	10.16	5.25	?	?	5.25	112.17	3	2	0	0	1	1	21	1	17.035	0.000934348	0.009854028	0.005873228	6.1555	3	0	1	110	0	0
deta	1.33	9.93	8.84	5.34	?	5.37	103.17	6	3	1	1	0	0	19	0	14.23	0.000942896	0.01111031	0.00073471	2.0102	3	0	1	110	1	2
tren	1.5	9.89	9.32	8.89	2.65	2.65	146.23	6	4	1	0	0	0	27	0	13.18	0.000989912	0.015586698	0.001009369	6.2682	1	1	0	90	0	0
Aqn	3.5	10.35	7.28	?	?	7.28	126.2	6	2	1	0	1	1	24	1	19.645	0.001022718	0.01556597	0.000971274	6.1408	1	1	0	90	0	0
bapp	2.5	10.48	9.88	7.55	1.75	1.75	200.32	11	4	1	0	0	0	38	0	17.845	0.00091774	0.016795242	0.00110423	6.4535	1	1	0	90	1	1
2-mpip	2.5	9.65	5.3	?	?	5.3	100.16	6	2	0	1	1	0	19	1	18.035	0.001225293	0.003627433	0.001235024	9.0734	5	1	0	90	0	0
tmed	3	9.41	5.34	?	?	5.34	116.2	5	2	0	0	0	0	19	0	22.88	0.00120807	0.003704939	0.001185026	9.0432	5	1	0	90	0	0
2,5-dmpip	3	9.75	5.41	?	?	5.41	114.19	6	2	0	1	1	0	22	1	22.155	0.00120643	0.003726568	0.001212891	9.0526	5	1	0	90	0	0
3-apyr	2	10.84	7.34	?	?	7.34	86.14	5	2	1	1	1	0	16	1	16.325	0.001212991	0.003605804	0.001234125	9.038	5	1	0	90	0	0
Aqn	3.5	10.35	7.28	?	?	7.28	126.2	6	2	1	0	1	1	24	1	19.645	0.001185926	0.003692322	0.001113399	8.939	5	1	0	90	0	0
Aqn	3.5	10.35	7.28	?	?	7.28	126.2	6	2	1	0	1	1	24	1	19.645	0.000995653	0.006078933	0.000983327	6.3364	1	1	0	150	0	0
2,5-dmpip	3	9.75	5.41	?	?	5.41	114.19	6	2	0	1	1	0	22	1	22.155	0.000994833	0.006208421	0.001045626	6.0459	2	1	0	150	0	0
2-mpip	2.5	9.65	5.3	?	?	5.3	100.16	6	2	0	1	1	0	19	1	18.035	0.000985812	0.006453439	0.001002396	6.069	2	1	0	150	0	0
tmed	3	9.41	5.34	?	?	5.34	116.2	5	2	0	0	0	0	19	0	22.88	0.00097597	0.006030085	0.001020654	6.0551	2	1	0	150	0	0
en	1	9.69	6.98	?	?	6.98	60.1	3	2	1	0	0	0	11	0	14.025	0.00097843	0.006142514	0.001008319	6.1952	1	1	0	150	0	0
2-mpip	2.5	9.65	5.3	?	?	5.3	100.16	6	2	0	1	1	0	19	1	18.035	0.001005499	0.015182175	0.001079273	6.1403	2	1	0	150	0	0
3-apyr	2	10.84	7.34	?	?	7.34	86.14	5	2	1	1	1	0	16	1	16.325	0.000981696	0.015142227	0.00099145	6.0781	2	1	0	150	0	0
2,5-dmpip	3	9.75	5.41	?	?	5.41	114.19	6	2	0	1	1	0	22	1	22.155	0.000984979	0.015568565	0.001078904	6.2024	2	1	0	150	0	0
